# Supplementary material for: Assessing the Prognostic Performance of the Child-Pugh, Model for End-Stage Liver Disease, and Albumin-Bilirubin Scores in Patients with Decompensated Cirrhosis: A Large Asian Cohort from Gastroenterology Department
Source: Hindawi journal article supplement (doi:10.1155/2020/5193028), 2020-02-17
Supplement: f1 [file 5193028.f1.pdf]

Supplement table 1: Cause of death of patients with DeCi

| Cause of death                | 28-days (n=50) | 90-days (n=76) | 6-months (n=91) |
|-------------------------------|----------------|----------------|-----------------|
| Respiratory failure, n (%)    | 15(30%)        | 15(19.7%)      | 15(16.5%)       |
| Hemorrhagic shock, n (%)      | 20(40%)        | 34(44.7%)      | 44(48.4%)       |
| Infectious shock, n (%)       | 4(8%)          | 4(5.3%)        | 5(5.5%)         |
| Hepatic encephalopathy, n (%) | 4(8%)          | 7(9.2%)        | 10(11.0%)       |
| Hepatorenal syndrome, n (%)   | 3(6%)          | 5(6.6%)        | 5(5.5%)         |
| Liver failure, n (%)          | 4(8%)          | 4(5.3%)        | 4(4.4%)         |
| Uncertain, n (%)              | 0(0%)          | 7(9.2%)        | 8(8.8%)         |

Supplementary table 2: basic information and treatment differences between those who were lost to follow-up and the overall patient

| Variable                        | Decompensated patients with Cirrhosis (n=456) | Loss to follow-up for 28-days (n=31) | P value | Loss to follow-up for 90-days (n=77) | P value | Loss to follow-up for 6-months (n=158) | P value |
|---------------------------------|-----------------------------------------------|--------------------------------------|---------|--------------------------------------|---------|----------------------------------------|---------|
| Sex (man), n (%)                | 344(75.4%)                                    | 21(67.7%)                            | 0.339   | 54(70.1%)                            | 0.322   | 116(73.4%)                             | 0.614   |
| Age, median (IQR)               | 53.5(46-63.75)                                | 56.5(58-67.5)                        | 0.749   | 57.5(55.5-68.5)                      | 0.562   | 57(56.5-68.5)                          | 0.657   |
| Cause of liver cirrhosis, n (%) |                                               |                                      | 0.341   |                                      | 0.128   |                                        | 0.171   |
| Viral                           | 276(60.5%)                                    | 21(67.7%)                            |         | 50(71.4%)                            |         | 95(65.2%)                              |         |
| Alcoholic                       | 72(15.8%)                                     | 7(25.8%)                             |         | 17(22.1%)                            |         | 36(26.0%)                              |         |
| Combined alcoholic viral        | 37(8.1%)                                      | 2(6.5%)                              |         | 5(3.9%)                              |         | 12(4.4%)                               |         |
| Other                           | 28(6.1%)                                      | 1(3.2%)                              |         | 2(2.3%)                              |         | 6(3.2%)                                |         |
| Cryptogenic                     | 43(9.4%)                                      | 0(0%)                                |         | 2(2.3%)                              |         | 9(1.9%)                                |         |
| Cause of hospitalization, n (%) |                                               |                                      | 0.897   |                                      | 0.394   |                                        | 0.094   |
| Ascites                         | 3(0.7%)                                       | 0(0%)                                |         | 0(0%)                                |         | 1(0.6%)                                |         |
| Gastrointestinal hemorrhage     | 407(89.2%)                                    | 28(90.3%)                            |         | 72(93.5%)                            |         | 151(95.6%)                             |         |
| Hepatic encephalopathy          | 22(4.8%)                                      | 2(6.5%)                              |         | 3(3.9%)                              |         | 4(2.5%)                                |         |
| Infection                       | 24(5.3%)                                      | 1(3.2%)                              |         | 1(3.2%)                              |         | 2(1.3%)                                |         |
| Ascites degree                  |                                               |                                      | 0.954   |                                      | 0.344   |                                        | 0.179   |
| No ascites                      | 195(42.8%)                                    | 14(45.2%)                            |         | 40(51.9%)                            |         | 79(50.0%)                              |         |
| 1-degree ascites                | 123(27.0%)                                    | 9(29.0%)                             |         | 21(27.3%)                            |         | 48(30.4%)                              |         |
| 2-degree ascites                | 80(17.5%)                                     | 5(16.2%)                             |         | 9(11.7%)                             |         | 19(12.3%)                              |         |
| 3-degree ascites                | 58(12.7%)                                     | 3(9.7%)                              |         | 7(9.1%)                              |         | 12(7.6%)                               |         |
| Acute renal failure, n (%)      | 20(4.4%)                                      | 1(3.2%)                              | 0.758   | 2(2.6%)                              | 0.466   | 5(3.2%)                                | 0.503   |
| Hepatocellular carcinoma, n (%) | 56(12.3%)                                     | 3(9.7%)                              | 0.667   | 11(14.2%)                            | 0.624   | 26(16.5%)                              | 0.184   |
| Therapy, n (%)                  |                                               |                                      |         |                                      |         |                                        |         |
| Vasopressor support             | 144(31.6%)                                    | 11(35.4%)                            | 0.239   | 16(20.7%)                            | 0.333   | 31(19.6%)                              | 0.105   |
| Mechanical ventilation          | 27(5.9%)                                      | 3(9.7%)                              | 0.400   | 3(3.9%)                              | 0.476   | 5(3.2%)                                | 0.179   |
| Renal replacement therapy       | 2(4.4%)                                       | 1(3.2%)                              | 0.179   | 1(3.2%)                              | 0.374   | 1(0.6%)                                | 0.763   |

IQR: interquartile range
